# Supplementary material for: Association between circulating vitamin E and ten common cancers: evidence from large-scale Mendelian randomization analysis and a longitudinal cohort study
Source: Springer Nature journal article supplement (doi:10.1186/s12916-022-02366-5), 2022-05-11
Supplement: MOESM1 [file 20392778]

## Supplementary information

**Table S1.** Summary of cancer-specific GWAS data included in Mendelian randomization (MR) analysis.

| Cancer type             | Sample size (N = 602,435) |                           | Data type             | Source <sup>a</sup>                                       |
|-------------------------|---------------------------|---------------------------|-----------------------|-----------------------------------------------------------|
|                         | Cases<br>(N = 297,699)    | Controls<br>(N = 304,736) |                       |                                                           |
| Bladder cancer          | 5,930                     | 5,468                     | Individual-level data | dbGaP (phs000346.v2.p2)                                   |
| Breast cancer           | 122,977                   | 105,974                   | Summary-level data    | BCAC                                                      |
| Colorectal cancer       | 24,476                    | 23,073                    | Individual-level data | dbGaP (phs001078.v1.p1, phs001315.v1.p1, phs001415.v1.p1) |
| Esophagus cancer        | 2,268                     | 1,865                     | Individual-level data | dbGaP (phs000869.v1.p1)                                   |
| Lung cancer             | 29,266                    | 56,450                    | Summary-level data    | TRICL-ILCCO OncoArray data                                |
| Oral and pharynx cancer | 4,950                     | 2,907                     | Individual-level data | dbGaP (phs001202.v1.p1)                                   |
| Ovarian cancer          | 22,406                    | 40,941                    | Summary-level data    | OCAC                                                      |
| Pancreatic cancer       | 4,970                     | 3,532                     | Individual-level data | dbGaP (phs000206.v5.p3)                                   |
| Prostate cancer         | 79,148                    | 61,106                    | Summary-level data    | PRACTICAL                                                 |
| Kidney cancer           | 1,308                     | 3,420                     | Individual-level data | dbGaP (phs000351.v1.p1)                                   |

<sup>a</sup> dbGaP, the database of Genotypes and Phenotypes; BCAC, the Breast Cancer Association Consortium (<http://bcac.ccge.medschl.cam.ac.uk/>); OCAC, the Ovarian Cancer Association Consortium (<http://ocac.ccge.medschl.cam.ac.uk/>); PRACTICAL, the Prostate Cancer Association Group to Investigate Cancer Associated Alterations in the Genome (<http://practical.icr.ac.uk/blog/>); TRICL-ILCCO, the Transdisciplinary Research in Cancer of the lung and the International Lung Cancer Consortium.

**Table S2.** ICD-10 diagnosis codes for ten cancers in the UK Biobank cohort.

| Cancer type             | Cases | ICD-10 codes  |
|-------------------------|-------|---------------|
| Bladder cancer          | 526   | C67           |
| Breast cancer (female)  | 4,350 | C50           |
| Colorectal cancer       | 2,621 | C18, C19, C20 |
| Esophagus cancer        | 460   | C15           |
| Lung cancer             | 1,700 | C33, C34      |
| Oral and pharynx cancer | 458   | C00-C14       |
| Ovarian cancer (female) | 437   | C56           |
| Pancreatic cancer       | 506   | C25           |
| Prostate cancer (male)  | 4,882 | C61           |
| Kidney cancer           | 649   | C64           |

**Table S3.** Characteristics of circulating vitamin E-associated instrumental variants (IVs).

| Chr | SNP        | Position  | Nearby gene   | Allele <sup>a</sup> | Beta <sup>b</sup> | SE <sup>b</sup> | <i>P</i> <sup>b</sup>  |
|-----|------------|-----------|---------------|---------------------|-------------------|-----------------|------------------------|
| 11  | rs964184   | 116648917 | <i>ZNF259</i> | C/G                 | 0.04              | 0.01            | 7.80×10 <sup>-12</sup> |
| 12  | rs11057830 | 125307053 | <i>SCARB1</i> | G/A                 | 0.03              | 0.01            | 8.20×10 <sup>-9</sup>  |
| 19  | rs2108622  | 15990431  | <i>CYP4F2</i> | C/T                 | 0.03              | 0.01            | 1.40×10 <sup>-10</sup> |

<sup>a</sup> Reference/effect allele.

<sup>b</sup> Obtained from previous Vitamin E GWAS among European ancestry, Beta and SE are based on per effect allele per unit change in log vitamin E level.

**Table S4.** Associations of circulating vitamin E instrumental variants (IVs) with multiple cancer risk in cancer-specific GWAS.

| Cancer type             | SNP        | Allele <sup>a</sup> | OR <sup>b</sup> | 95% CI <sup>b</sup> | <i>P</i> <sup>b</sup> |
|-------------------------|------------|---------------------|-----------------|---------------------|-----------------------|
| Bladder cancer          | rs964184   | C/G                 | 1.02            | 0.94, 1.10          | 0.665                 |
|                         | rs11057830 | G/A                 | 1.10            | 1.02, 1.19          | 0.015                 |
|                         | rs2108622  | C/T                 | 1.08            | 1.02, 1.14          | 0.013                 |
| Breast cancer           | rs964184   | C/G                 | 0.98            | 0.96, 1.00          | 0.043                 |
|                         | rs11057830 | G/A                 | 0.98            | 0.97, 1.00          | 0.089                 |
|                         | rs2108622  | C/T                 | 0.99            | 0.98, 1.01          | 0.351                 |
| Colorectal cancer       | rs964184   | C/G                 | 1.02            | 0.98, 1.05          | 0.395                 |
|                         | rs11057830 | G/A                 | 1.02            | 0.98, 1.06          | 0.351                 |
|                         | rs2108622  | C/T                 | 0.99            | 0.96, 1.02          | 0.532                 |
| Esophagus cancer        | rs964184   | C/G                 | 1.07            | 0.93, 1.22          | 0.361                 |
|                         | rs11057830 | G/A                 | 0.93            | 0.81, 1.06          | 0.266                 |
|                         | rs2108622  | C/T                 | 0.94            | 0.85, 1.04          | 0.202                 |
| Lung cancer             | rs964184   | C/G                 | 1.02            | 0.99, 1.06          | 0.207                 |
|                         | rs11057830 | G/A                 | 1.01            | 0.97, 1.04          | 0.708                 |
|                         | rs2108622  | C/T                 | 0.98            | 0.96, 1.00          | 0.112                 |
| Oral and pharynx cancer | rs964184   | C/G                 | 0.95            | 0.86, 1.05          | 0.285                 |
|                         | rs11057830 | G/A                 | 0.97            | 0.89, 1.07          | 0.560                 |
|                         | rs2108622  | C/T                 | 1.03            | 0.96, 1.11          | 0.411                 |
| Ovarian cancer          | rs964184   | C/G                 | 0.99            | 0.96, 1.03          | 0.684                 |
|                         | rs11057830 | G/A                 | 0.99            | 0.96, 1.03          | 0.685                 |
|                         | rs2108622  | C/T                 | 1.00            | 0.97, 1.03          | 0.843                 |
| Pancreatic cancer       | rs964184   | C/G                 | 0.95            | 0.87, 1.04          | 0.283                 |
|                         | rs11057830 | G/A                 | 0.99            | 0.91, 1.08          | 0.868                 |
|                         | rs2108622  | C/T                 | 1.06            | 0.99, 1.13          | 0.104                 |
| Prostate cancer         | rs964184   | C/G                 | 0.99            | 0.96, 1.01          | 0.255                 |
|                         | rs11057830 | G/A                 | 1.00            | 0.98, 1.03          | 0.725                 |
|                         | rs2108622  | C/T                 | 1.00            | 0.98, 1.01          | 0.631                 |
| Kidney cancer           | rs964184   | C/G                 | 1.03            | 0.90, 1.18          | 0.651                 |
|                         | rs11057830 | G/A                 | 1.12            | 0.99, 1.27          | 0.080                 |
|                         | rs2108622  | C/T                 | 0.95            | 0.85, 1.05          | 0.305                 |

<sup>a</sup> Reference/effect allele.

<sup>b</sup> Adjusted for sex, age and first 10 principal components for individual level GWAS data (bladder cancer, colorectal cancer, esophagus cancer, oral and pharynx cancer, pancreatic cancer and kidney cancer).

**Table S5.** Mendelian randomization (MR) analysis for the associations of circulating vitamin E with cancer risk in cancer-specific GWAS.

| Cancer type             | Method <sup>a</sup> | Estimate <sup>b</sup> | 95% CI <sup>b</sup> | <i>P</i>              |
|-------------------------|---------------------|-----------------------|---------------------|-----------------------|
| Bladder cancer          | IVW                 | 6.23                  | 1.86, 20.90         | 3.05×10 <sup>-3</sup> |
|                         | Likelihood          | 6.99                  | 1.71, 28.51         | 6.69×10 <sup>-3</sup> |
|                         | GRS                 | 7.34                  | 2.13, 25.24         | 1.57×10 <sup>-3</sup> |
|                         | Egger (intercept)   | 0.279                 | -0.018, 0.576       | 0.066                 |
| Breast cancer           | IVW                 | 0.68                  | 0.51, 0.91          | 8.19×10 <sup>-3</sup> |
|                         | Likelihood          | 0.67                  | 0.48, 0.93          | 0.017                 |
|                         | Egger (intercept)   | 0.015                 | -0.054, 0.084       | 0.676                 |
| Colorectal cancer       | IVW                 | 1.19                  | 0.66, 2.15          | 0.552                 |
|                         | Likelihood          | 1.21                  | 0.65, 2.24          | 0.546                 |
|                         | GRS                 | 1.19                  | 0.66, 2.15          | 0.568                 |
|                         | Egger (intercept)   | -0.045                | -0.206, 0.116       | 0.584                 |
| Esophagus cancer        | IVW                 | 0.44                  | 0.05, 3.66          | 0.446                 |
|                         | Likelihood          | 0.41                  | 0.05, 3.71          | 0.427                 |
|                         | GRS                 | 0.48                  | 0.05, 4.31          | 0.508                 |
|                         | Egger (intercept)   | -0.47                 | -0.995, 0.054       | 0.079                 |
| Lung cancer             | IVW                 | 1.00                  | 0.59, 1.68          | 0.994                 |
|                         | Likelihood          | 1.00                  | 0.57, 1.76          | 0.994                 |
|                         | Egger (intercept)   | -0.107                | -0.267, 0.053       | 0.190                 |
| Oral and pharynx cancer | IVW                 | 0.72                  | 0.16, 3.20          | 0.662                 |
|                         | Likelihood          | 0.70                  | 0.14, 3.37          | 0.654                 |
|                         | GRS                 | 0.80                  | 0.18, 3.61          | 0.771                 |
|                         | Egger (intercept)   | 0.192                 | -0.180, 0.564       | 0.311                 |
| Ovarian cancer          | IVW                 | 0.84                  | 0.47, 1.52          | 0.570                 |
|                         | Likelihood          | 0.84                  | 0.46, 1.53          | 0.572                 |
|                         | Egger (intercept)   | 0.005                 | -0.140, 0.149       | 0.951                 |
| Pancreatic cancer       | IVW                 | 1.19                  | 0.29, 4.81          | 0.807                 |
|                         | Likelihood          | 1.22                  | 0.28, 5.38          | 0.793                 |
|                         | GRS                 | 1.35                  | 0.33, 5.61          | 0.679                 |
|                         | Egger (intercept)   | 0.276                 | -0.117, 0.668       | 0.168                 |
| Prostate cancer         | IVW                 | 0.85                  | 0.59, 1.23          | 0.388                 |
|                         | Likelihood          | 0.85                  | 0.58, 1.23          | 0.389                 |
|                         | Egger (intercept)   | 0.035                 | -0.055, 0.124       | 0.447                 |
| Kidney cancer           | IVW                 | 1.82                  | 0.22, 15.08         | 0.578                 |
|                         | Likelihood          | 2.01                  | 0.20, 20.31         | 0.555                 |
|                         | GRS                 | 1.98                  | 0.24, 16.02         | 0.522                 |
|                         | Egger (intercept)   | -0.036                | -1.073, 1.002       | 0.947                 |

<sup>a</sup> IVW, inverse variance weighting; GRS, genetic risk score method.

<sup>b</sup> OR value of IVW, likelihood and GRS methods; beta value of Egger intercept test.

**Table S6.** Leave-one-out analysis for the associations between circulating vitamin E and cancer risk in cancer-specific GWAS.

| Cancer type             | SNP (left out) | OR <sup>a</sup> | 95% CI <sup>a</sup> | P <sup>a</sup>        |
|-------------------------|----------------|-----------------|---------------------|-----------------------|
| Bladder cancer          | rs964184       | 15.62           | 3.29, 74.07         | 5.39×10 <sup>-4</sup> |
|                         | rs11057830     | 4.22            | 1.06, 16.73         | 0.041                 |
|                         | rs2108622      | 4.14            | 0.89, 19.17         | 0.069                 |
| Breast cancer           | rs964184       | 0.72            | 0.50, 1.04          | 0.079                 |
|                         | rs11057830     | 0.71            | 0.52, 0.98          | 0.036                 |
|                         | rs2108622      | 0.61            | 0.43, 0.88          | 8.36×10 <sup>-3</sup> |
| Colorectal cancer       | rs964184       | 1.03            | 0.48, 2.19          | 0.939                 |
|                         | rs11057830     | 1.06            | 0.54, 2.07          | 0.864                 |
|                         | rs2108622      | 1.60            | 0.76, 3.37          | 0.215                 |
| Esophagus cancer        | rs964184       | 0.10            | 0.01, 1.46          | 0.092                 |
|                         | rs11057830     | 0.71            | 0.06, 7.82          | 0.781                 |
|                         | rs2108622      | 1.09            | 0.07, 17.00         | 0.951                 |
| Lung cancer             | rs964184       | 0.70            | 0.35, 1.37          | 0.294                 |
|                         | rs11057830     | 0.94            | 0.52, 1.70          | 0.839                 |
|                         | rs2108622      | 1.52            | 0.78, 2.96          | 0.215                 |
| Oral and pharynx cancer | rs964184       | 1.30            | 0.20, 8.55          | 0.787                 |
|                         | rs11057830     | 0.86            | 0.15, 4.87          | 0.867                 |
|                         | rs2108622      | 0.31            | 0.05, 2.10          | 0.232                 |
| Ovarian cancer          | rs964184       | 0.86            | 0.40, 1.83          | 0.688                 |
|                         | rs11057830     | 0.86            | 0.44, 1.69          | 0.668                 |
|                         | rs2108622      | 0.80            | 0.38, 1.71          | 0.570                 |
| Pancreatic cancer       | rs964184       | 2.92            | 0.49, 17.44         | 0.241                 |
|                         | rs11057830     | 1.35            | 0.27, 6.68          | 0.711                 |
|                         | rs2108622      | 0.42            | 0.07, 2.48          | 0.342                 |
| Prostate cancer         | rs964184       | 0.96            | 0.59, 1.54          | 0.860                 |
|                         | rs11057830     | 0.78            | 0.52, 1.18          | 0.249                 |
|                         | rs2108622      | 0.84            | 0.53, 1.34          | 0.473                 |
| Kidney cancer           | rs964184       | 1.62            | 0.11, 24.45         | 0.727                 |
|                         | rs11057830     | 0.63            | 0.05, 7.22          | 0.707                 |
|                         | rs2108622      | 6.99            | 0.50, 96.84         | 0.147                 |

<sup>a</sup> IVW, inverse variance weighting method.

**Table S7.** Summary of 24 traits related to circulating vitamin E associated SNPs.

| SNP        | Effect allele | Trait                                                         | Beta <sup>a</sup>      | P <sup>a</sup>          |
|------------|---------------|---------------------------------------------------------------|------------------------|-------------------------|
| rs964184   | C             | E70-E90 Metabolic disorders                                   | -8.65×10 <sup>-3</sup> | 9.09×10 <sup>-22</sup>  |
| rs964184   | C             | E78 Disorders of lipoprotein metabolism and other lipidaemias | -9.58×10 <sup>-3</sup> | 2.45×10 <sup>-31</sup>  |
| rs964184   | C             | Eosinophill count                                             | 2.43×10 <sup>-3</sup>  | 2.03×10 <sup>-13</sup>  |
| rs964184   | C             | Eosinophill percentage                                        | 0.03                   | 6.99×10 <sup>-13</sup>  |
| rs964184   | C             | High cholesterol                                              | -0.02                  | 1.87×10 <sup>-103</sup> |
| rs964184   | C             | High light scatter reticulocyte count                         | -2.50×10 <sup>-4</sup> | 4.98×10 <sup>-26</sup>  |
| rs964184   | C             | High light scatter reticulocyte percentage                    | -5.46×10 <sup>-3</sup> | 1.94×10 <sup>-25</sup>  |
| rs964184   | C             | Mean corpuscular haemoglobin concentration                    | -0.03                  | 2.15×10 <sup>-27</sup>  |
| rs964184   | C             | Mean corpuscular volume                                       | 0.09                   | 6.17×10 <sup>-18</sup>  |
| rs964184   | C             | Mean platelet (thrombocyte) volume                            | -0.03                  | 9.84×10 <sup>-38</sup>  |
| rs964184   | C             | Mean reticulocyte volume                                      | 0.28                   | 1.01×10 <sup>-46</sup>  |
| rs964184   | C             | Mean sphered cell volume                                      | 0.19                   | 2.50×10 <sup>-52</sup>  |
| rs964184   | C             | Monocyte count                                                | 2.40×10 <sup>-3</sup>  | 6.39×10 <sup>-9</sup>   |
| rs964184   | C             | Platelet count                                                | 1.71                   | 3.46×10 <sup>-37</sup>  |
| rs964184   | C             | Platelet crit                                                 | 8.24×10 <sup>-4</sup>  | 1.28×10 <sup>-13</sup>  |
| rs964184   | C             | Platelet distribution width                                   | -0.03                  | 9.26×10 <sup>-160</sup> |
| rs964184   | C             | Red blood cell (erythrocyte) distribution width               | 0.03                   | 3.30×10 <sup>-26</sup>  |
| rs964184   | C             | Reticulocyte count                                            | -7.70×10 <sup>-4</sup> | 1.60×10 <sup>-32</sup>  |
| rs964184   | C             | Reticulocyte percentage                                       | -0.02                  | 9.38×10 <sup>-32</sup>  |
| rs11057830 | A             | E70-E90 Metabolic disorders                                   | 5.16×10 <sup>-3</sup>  | 5.31×10 <sup>-9</sup>   |
| rs11057830 | A             | E78 Disorders of lipoprotein metabolism and other lipidaemias | 4.71×10 <sup>-3</sup>  | 4.91×10 <sup>-9</sup>   |
| rs11057830 | A             | High cholesterol                                              | 5.39×10 <sup>-3</sup>  | 3.89×10 <sup>-9</sup>   |
| rs11057830 | A             | I20-I25 Ischaemic heart diseases                              | 4.44×10 <sup>-3</sup>  | 2.75×10 <sup>-9</sup>   |
| rs11057830 | A             | I25 Chronic ischaemic heart disease                           | 4.10×10 <sup>-3</sup>  | 2.46×10 <sup>-9</sup>   |
| rs11057830 | A             | Lymphocyte count                                              | -8.75×10 <sup>-3</sup> | 3.65×10 <sup>-8</sup>   |
| rs11057830 | A             | Mean corpuscular haemoglobin                                  | -0.03                  | 9.68×10 <sup>-10</sup>  |
| rs11057830 | A             | Mean corpuscular volume                                       | -0.07                  | 1.55×10 <sup>-10</sup>  |
| rs11057830 | A             | Mean sphered cell volume                                      | -0.08                  | 2.41×10 <sup>-10</sup>  |
| rs11057830 | A             | Monocyte count                                                | 2.62×10 <sup>-3</sup>  | 1.09×10 <sup>-10</sup>  |
| rs11057830 | A             | Monocyte percentage                                           | 0.05                   | 5.93×10 <sup>-22</sup>  |

<sup>a</sup> From Gene ATLAS database (<http://geneatlas.roslin.ed.ac.uk/>) ( $P < 5 \times 10^{-8}$ ).

**Table S8.** Sensitivity analysis of genetic risk score (GRS) analysis for the associations of vitamin E with cancer risk in the UK Biobank cohort.

| Method                                                                   | Cancer type             | Cases  | Method <sup>a</sup>             | OR/HR <sup>b</sup> | 95% CI <sup>b</sup> | <i>P</i> <sup>b</sup> | Corrected <i>P</i> <sup>c</sup> |
|--------------------------------------------------------------------------|-------------------------|--------|---------------------------------|--------------------|---------------------|-----------------------|---------------------------------|
| Analysis with incident and prevalent cancer cases in case-control design | Bladder cancer          | 1,035  | Circulating vitamin E based GRS | 0.75               | 0.10, 5.74          | 0.781                 | 0.887                           |
|                                                                          |                         |        | One-sample weighted GRS         | 0.47               | 0.25, 0.91          | 0.026                 | 0.260                           |
|                                                                          |                         |        | One-sample unweighted GRS       | 0.52               | 0.26, 1.01          | 0.053                 | 0.530                           |
|                                                                          | Breast cancer           | 10,913 | Circulating vitamin E based GRS | 1.27               | 0.65, 2.48          | 0.477                 | 0.887                           |
|                                                                          |                         |        | One-sample weighted GRS         | 1.14               | 0.97, 1.35          | 0.122                 | 0.610                           |
|                                                                          |                         |        | One-sample unweighted GRS       | 1.13               | 0.95, 1.35          | 0.168                 | 0.560                           |
|                                                                          | Colorectal cancer       | 4,660  | Circulating vitamin E based GRS | 1.13               | 0.43, 2.96          | 0.808                 | 0.887                           |
|                                                                          |                         |        | One-sample weighted GRS         | 1.24               | 0.90, 1.69          | 0.184                 | 0.613                           |
|                                                                          |                         |        | One-sample unweighted GRS       | 1.25               | 0.91, 1.72          | 0.167                 | 0.560                           |
|                                                                          | Esophagus cancer        | 626    | Circulating vitamin E based GRS | 13.45              | 1.03, 175.2         | 0.047                 | 0.235                           |
|                                                                          |                         |        | One-sample weighted GRS         | 1.11               | 0.47, 2.57          | 0.816                 | 0.925                           |
|                                                                          |                         |        | One-sample unweighted GRS       | 1.08               | 0.45, 2.57          | 0.861                 | 0.961                           |
|                                                                          | Lung cancer             | 2,155  | Circulating vitamin E based GRS | 1.25               | 0.30, 5.13          | 0.759                 | 0.887                           |
|                                                                          |                         |        | One-sample weighted GRS         | 1.22               | 0.77, 1.93          | 0.393                 | 0.768                           |
|                                                                          |                         |        | One-sample unweighted GRS       | 1.21               | 0.76, 1.93          | 0.425                 | 0.708                           |
|                                                                          | Oral and pharynx cancer | 906    | Circulating vitamin E based GRS | 1.17               | 0.13, 10.43         | 0.886                 | 0.887                           |
|                                                                          |                         |        | One-sample weighted GRS         | 0.73               | 0.36, 1.48          | 0.386                 | 0.768                           |
|                                                                          |                         |        | One-sample unweighted GRS       | 0.67               | 0.32, 1.37          | 0.267                 | 0.668                           |
|                                                                          | Ovarian cancer          | 965    | Circulating vitamin E based GRS | 2.62               | 0.32, 21.44         | 0.369                 | 0.887                           |
|                                                                          |                         |        | One-sample weighted GRS         | 0.82               | 0.48, 1.40          | 0.461                 | 0.768                           |
|                                                                          |                         |        | One-sample unweighted GRS       | 0.78               | 0.45, 1.37          | 0.389                 | 0.708                           |
|                                                                          | Pancreatic cancer       | 601    | Circulating vitamin E based GRS | 0.82               | 0.06, 12.11         | 0.887                 | 0.887                           |
|                                                                          |                         |        | One-sample weighted GRS         | 1.04               | 0.44, 2.47          | 0.925                 | 0.925                           |



|                                                                     |                         |       |                                 |       |              |       |       |
|---------------------------------------------------------------------|-------------------------|-------|---------------------------------|-------|--------------|-------|-------|
|                                                                     |                         |       | One-sample unweighted GRS       | 1.08  | 0.45, 2.62   | 0.865 | 0.961 |
|                                                                     | Prostate cancer         | 7,743 | Circulating vitamin E based GRS | 0.59  | 0.28, 1.27   | 0.179 | 0.597 |
|                                                                     |                         |       | One-sample weighted GRS         | 1.02  | 0.83, 1.25   | 0.869 | 0.925 |
|                                                                     |                         |       | One-sample unweighted GRS       | 1.04  | 0.84, 1.28   | 0.727 | 0.961 |
|                                                                     | Kidney cancer           | 1,077 | Circulating vitamin E based GRS | 0.06  | 0.01, 0.46   | 0.007 | 0.070 |
|                                                                     |                         |       | One-sample weighted GRS         | 0.94  | 0.49, 1.78   | 0.84  | 0.925 |
|                                                                     |                         |       | One-sample unweighted GRS       | 1     | 0.52, 1.94   | 0.995 | 0.995 |
| Additionally adjusting for socioeconomic and chronic disease status | Bladder cancer          | 526   | Circulating vitamin E based GRS | 0.98  | 0.06, 16.7   | 0.991 | 0.991 |
|                                                                     |                         |       | One-sample weighted GRS         | 0.69  | 0.27, 1.75   | 0.437 | 0.939 |
|                                                                     |                         |       | One-sample unweighted GRS       | 0.74  | 0.28, 1.90   | 0.527 | 0.931 |
|                                                                     | Breast cancer           | 4,350 | Circulating vitamin E based GRS | 2.31  | 0.86, 6.18   | 0.096 | 0.350 |
|                                                                     |                         |       | One-sample weighted GRS         | 1.04  | 0.81, 1.34   | 0.758 | 0.939 |
|                                                                     |                         |       | One-sample unweighted GRS       | 1.04  | 0.80, 1.35   | 0.786 | 0.931 |
|                                                                     | Colorectal cancer       | 2,621 | Circulating vitamin E based GRS | 0.38  | 0.10, 1.38   | 0.14  | 0.350 |
|                                                                     |                         |       | One-sample weighted GRS         | 1.19  | 0.78, 1.80   | 0.416 | 0.939 |
|                                                                     |                         |       | One-sample unweighted GRS       | 1.22  | 0.80, 1.87   | 0.363 | 0.931 |
|                                                                     | Esophagus cancer        | 460   | Circulating vitamin E based GRS | 10.22 | 0.51, 203.11 | 0.127 | 0.350 |
|                                                                     |                         |       | One-sample weighted GRS         | 0.96  | 0.36, 2.59   | 0.939 | 0.939 |
|                                                                     |                         |       | One-sample unweighted GRS       | 0.95  | 0.35, 2.62   | 0.923 | 0.931 |
|                                                                     | Lung cancer             | 1,700 | Circulating vitamin E based GRS | 0.76  | 0.15, 3.80   | 0.743 | 0.991 |
|                                                                     |                         |       | One-sample weighted GRS         | 1.29  | 0.77, 2.17   | 0.334 | 0.939 |
|                                                                     |                         |       | One-sample unweighted GRS       | 1.25  | 0.74, 2.12   | 0.409 | 0.931 |
|                                                                     | Oral and pharynx cancer | 458   | Circulating vitamin E based GRS | 0.89  | 0.04, 18.92  | 0.939 | 0.991 |
|                                                                     |                         |       | One-sample weighted GRS         | 0.89  | 0.33, 2.40   | 0.818 | 0.939 |
|                                                                     |                         |       | One-sample unweighted GRS       | 0.83  | 0.30, 2.28   | 0.713 | 0.931 |
|                                                                     | Ovarian cancer          | 437   | Circulating vitamin E based GRS | 1.42  | 0.06, 32.79  | 0.826 | 0.991 |

|                   |       |                                 |      |            |       |       |
|-------------------|-------|---------------------------------|------|------------|-------|-------|
|                   |       | One-sample weighted GRS         | 0.84 | 0.38, 1.87 | 0.669 | 0.939 |
|                   |       | One-sample unweighted GRS       | 0.84 | 0.37, 1.92 | 0.679 | 0.931 |
| Pancreatic cancer | 506   | Circulating vitamin E based GRS | 1.16 | 0.06, 21.8 | 0.92  | 0.991 |
|                   |       | One-sample weighted GRS         | 0.93 | 0.36, 2.40 | 0.879 | 0.939 |
|                   |       | One-sample unweighted GRS       | 0.96 | 0.36, 2.53 | 0.931 | 0.931 |
| Prostate cancer   | 4,882 | Circulating vitamin E based GRS | 0.57 | 0.22, 1.46 | 0.237 | 0.474 |
|                   |       | One-sample weighted GRS         | 0.92 | 0.71, 1.18 | 0.51  | 0.939 |
|                   |       | One-sample unweighted GRS       | 0.95 | 0.74, 1.24 | 0.72  | 0.931 |
| Kidney cancer     | 649   | Circulating vitamin E based GRS | 0.11 | 0.01, 1.53 | 0.101 | 0.350 |
|                   |       | One-sample weighted GRS         | 0.70 | 0.30, 1.60 | 0.396 | 0.939 |
|                   |       | One-sample unweighted GRS       | 0.74 | 0.32, 1.74 | 0.491 | 0.931 |

<sup>a</sup> Circulating vitamin E based GRS, derived from three circulating vitamin E-SNPs; one-sample weighted and unweighted GRS, derived from dietary vitamin E-SNPs ( $P$ -value  $\leq 5 \times 10^{-5}$ ).

<sup>b</sup> Adjusted for sex, age, study centers, body mass index (BMI), smoking status, drinking status, and first ten principal components when appropriate.

<sup>c</sup> The corrected  $P$ -value was calculated with false discovery rate (FDR) method.

**Table S9.** Summary of dietary vitamin E intake associated SNPs derived from the UK Biobank cohort.

| Population | Chr | SNP         | Position <sup>a</sup> | Allele <sup>b</sup> | Beta <sup>c</sup> | 95% CI <sup>c</sup> | <i>P</i> <sup>c</sup> |
|------------|-----|-------------|-----------------------|---------------------|-------------------|---------------------|-----------------------|
| All        | 2   | rs11889555  | 191886543             | A/G                 | 0.02              | 0.01, 0.03          | 7.59E-08              |
|            | 13  | rs139695510 | 97280551              | T/A                 | -0.03             | -0.05, -0.02        | 1.29E-07              |
|            | 22  | rs12165526  | 44361713              | T/A                 | 0.03              | 0.02, 0.05          | 2.79E-07              |
| Male       | 2   | rs11889555  | 191886543             | A/G                 | 0.03              | 0.02, 0.04          | 4.33E-07              |
| Female     | 13  | rs201524387 | 59189714              | CT/C                | 0.03              | 0.02, 0.05          | 1.96E-07              |

<sup>a</sup> Chromosomal position, hg19/GRCh37 build.

<sup>b</sup> Major/minor allele.

<sup>c</sup> Adjusted for sex, age, study centers, body mass index (BMI), smoking status, drinking status, and first ten principal components when appropriate.

**Table S10.** Functional annotation of dietary vitamin E intake associated SNPs.

| Population | Locus    | SNP         | Nearby gene | Promoter histone marks | Enhancer histone marks | DNAse    | Proteins bound | Motifs changed    | eGenes <sup>a</sup>                |
|------------|----------|-------------|-------------|------------------------|------------------------|----------|----------------|-------------------|------------------------------------|
| All        | 2q32.2   | rs11889555  | STAT1       | 8 organs               | 19 organs              | BLD, BLD | POL2           | 4 altered motifs  | GLS, TMEM194B, HIBCH, STAT1, INPP1 |
|            | 13q32.1  | rs139695510 | HS6ST3      |                        |                        |          |                | Mef2              |                                    |
|            | 22q13.31 | rs12165526  | SAMM50      |                        |                        |          |                | 6 altered motifs  |                                    |
| Male       | 2q32.2   | rs11889555  | STAT1       | 8 organs               | 19 organs              | BLD,BLD  | POL2           | 4 altered motifs  | GLS, TMEM194B, HIBCH, STAT1, INPP1 |
| Female     | 13q21.1  | rs201524387 | RNY4P29     |                        |                        |          |                | 11 altered motifs |                                    |

<sup>a</sup> Significant genes with cis-eQTL effects, derived from eQTLGen database.

**Table S11.** Summary of dietary vitamin E associated variants in the UK Biobank cohort.

| Population | Threshold of <i>P</i> -value | nSNPs | Weighted GRS          |             |                   |                         | Unweighted GRS        |             |                   |                         |
|------------|------------------------------|-------|-----------------------|-------------|-------------------|-------------------------|-----------------------|-------------|-------------------|-------------------------|
|            |                              |       | <i>R</i> <sup>2</sup> | F statistic | Beta <sup>a</sup> | <i>P</i> <sup>a</sup>   | <i>R</i> <sup>2</sup> | F statistic | Beta <sup>a</sup> | <i>P</i> <sup>a</sup>   |
| All        | 5×10 <sup>-7</sup>           | 3     | 0.002                 | 86.75       | 1                 | 6.74×10 <sup>-20</sup>  | 0.002                 | 83.28       | 0.03              | 3.34×10 <sup>-19</sup>  |
|            | 5×10 <sup>-6</sup>           | 9     | 0.004                 | 222.61      | 1                 | 3.70×10 <sup>-49</sup>  | 0.004                 | 212.67      | 0.02              | 3.69×10 <sup>-47</sup>  |
|            | 5×10 <sup>-5</sup>           | 69    | 0.025                 | 1274.96     | 0.98              | 1.30×10 <sup>-278</sup> | 0.024                 | 1206.63     | 0.02              | 9.65×10 <sup>-264</sup> |
| Male       | 5×10 <sup>-7</sup>           | 1     | 0.001                 | 24.76       | 0.03              | 4.33×10 <sup>-7</sup>   | 0.001                 | 24.76       | 0.03              | 4.33×10 <sup>-7</sup>   |
|            | 5×10 <sup>-6</sup>           | 8     | 0.008                 | 181.03      | 1                 | 3.30×10 <sup>-41</sup>  | 0.007                 | 170.46      | 0.03              | 5.93×10 <sup>-39</sup>  |
|            | 5×10 <sup>-5</sup>           | 44    | 0.034                 | 823.96      | 0.97              | 1.84×10 <sup>-179</sup> | 0.032                 | 771.55      | 0.03              | 5.62×10 <sup>-168</sup> |
| Female     | 5×10 <sup>-7</sup>           | 1     | 0.001                 | 27.94       | 0.03              | 1.96×10 <sup>-7</sup>   | 0.001                 | 27.94       | 0.03              | 1.96×10 <sup>-7</sup>   |
|            | 5×10 <sup>-6</sup>           | 6     | 0.005                 | 139.3       | 0.99              | 1.57×10 <sup>-31</sup>  | 0.005                 | 130.87      | 0.03              | 7.56×10 <sup>-30</sup>  |
|            | 5×10 <sup>-5</sup>           | 69    | 0.045                 | 1234.95     | 0.94              | 1.56×10 <sup>-266</sup> | 0.042                 | 1146.41     | 0.02              | 1.62×10 <sup>-248</sup> |

<sup>a</sup> Adjusted for sex, age, study centers, body mass index (BMI), smoking status, drinking status, and first 10 principal components when appropriate.

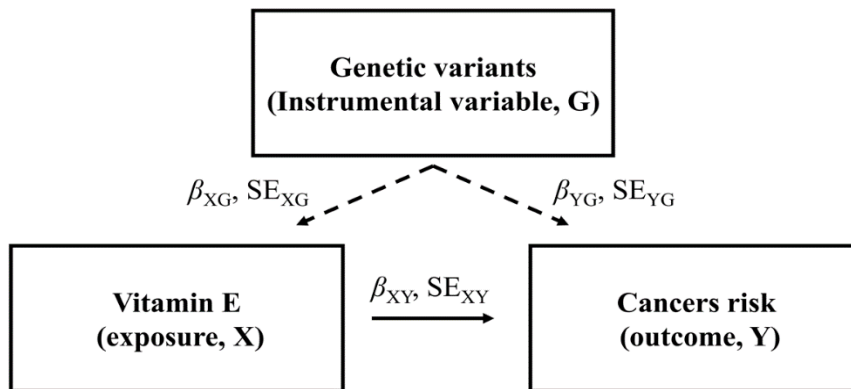

**Figure S1.** Conceptual framework of Mendelian randomization (MR) analysis in this study. We aim to estimate the unbiased causal relationship between vitamin E and cancer risk by incorporating genetic variants as instrumental variables (IVs). The association between vitamin E and cancer risk ( $\beta_{XY}, SE_{XY}$ ) is estimated using the association of IVs (i.e., SNP) with vitamin E ( $\beta_{XG}, SE_{XG}$ ) and cancer risk ( $\beta_{YG}, SE_{YG}$ ).

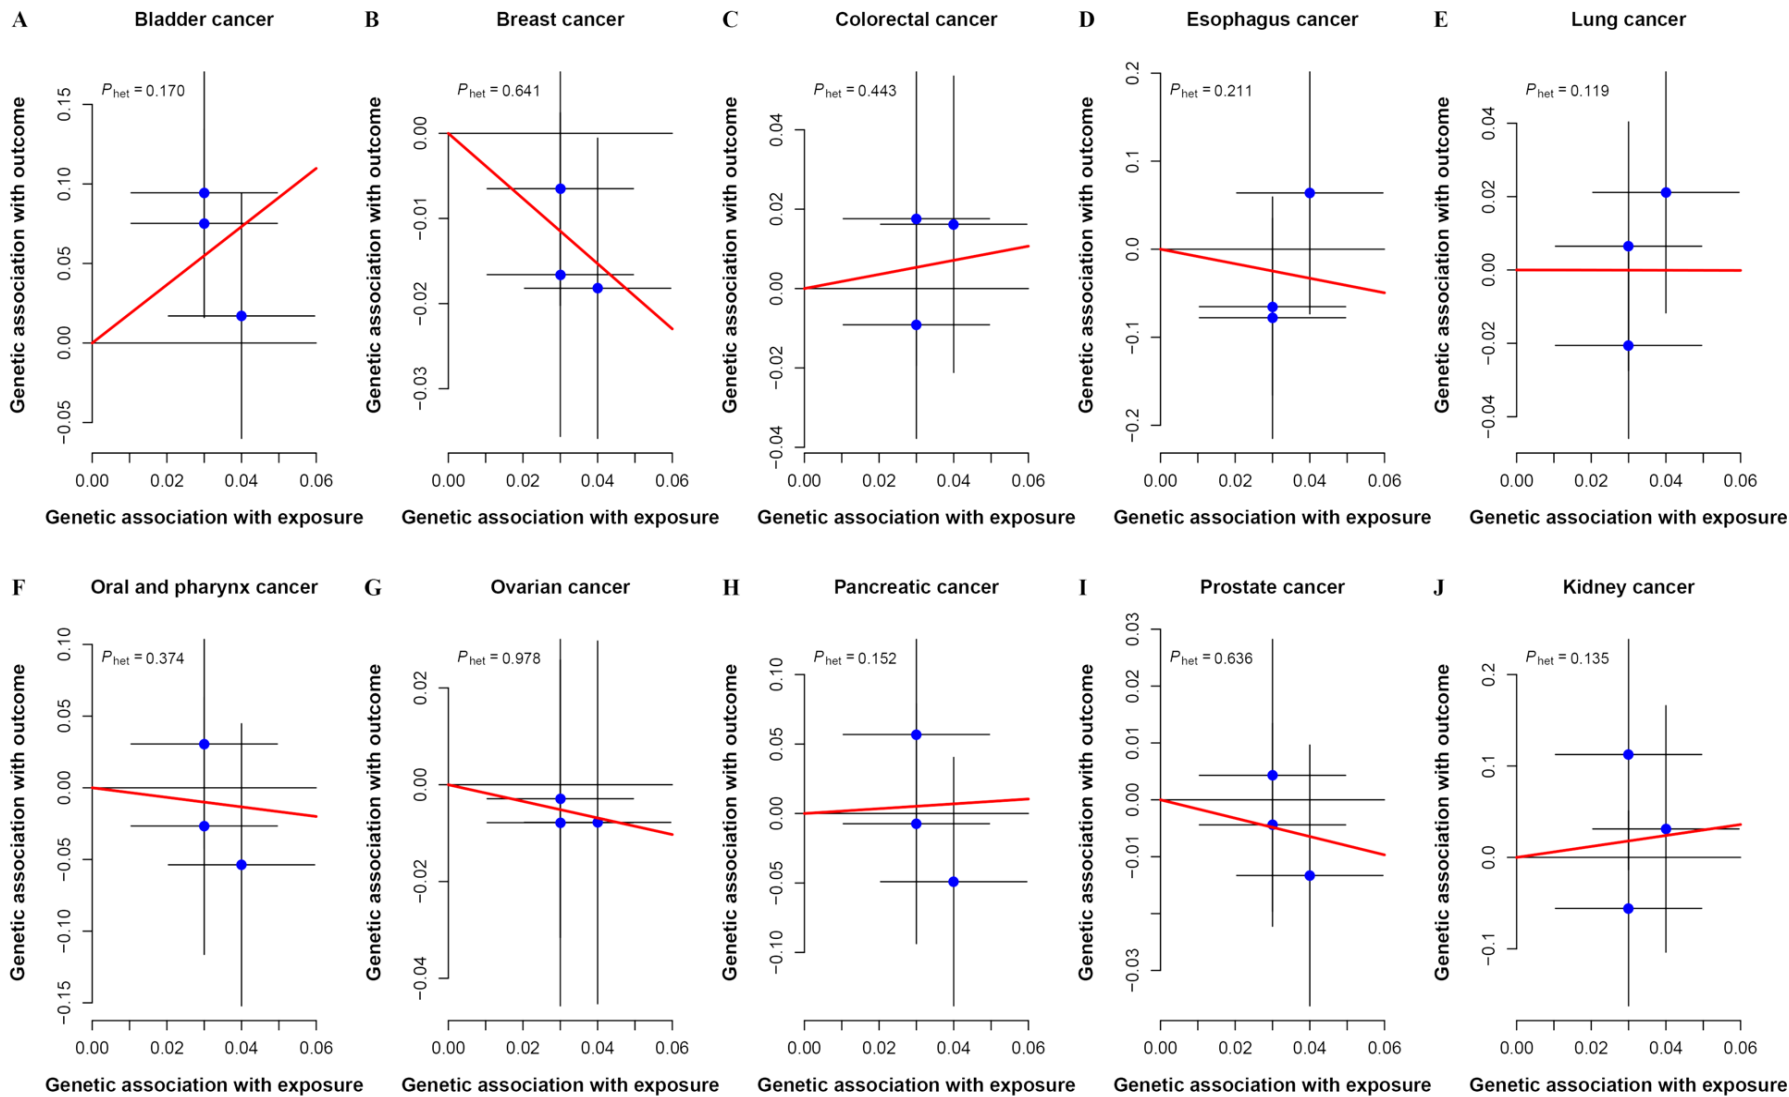

**Figure S2.** The effect of each variant on circulating vitamin E (exposure) and cancer risk (outcome) in cancer-specific GWAS. Error bars around each SNP are 95% confidence intervals. A best fit regression line (dashed line) was plotted using the inverse variance weighting (IVW) based estimate.  $P_{\text{het}}$  was calculated using heterogeneity test. (A) Bladder cancer; (B) breast cancer; (C) colorectal cancer; (D) esophagus cancer; (E) lung cancer; (F) oral and pharynx cancer; (G) ovarian cancer; (H) pancreatic cancer; (I) prostate cancer; (J) kidney cancer.



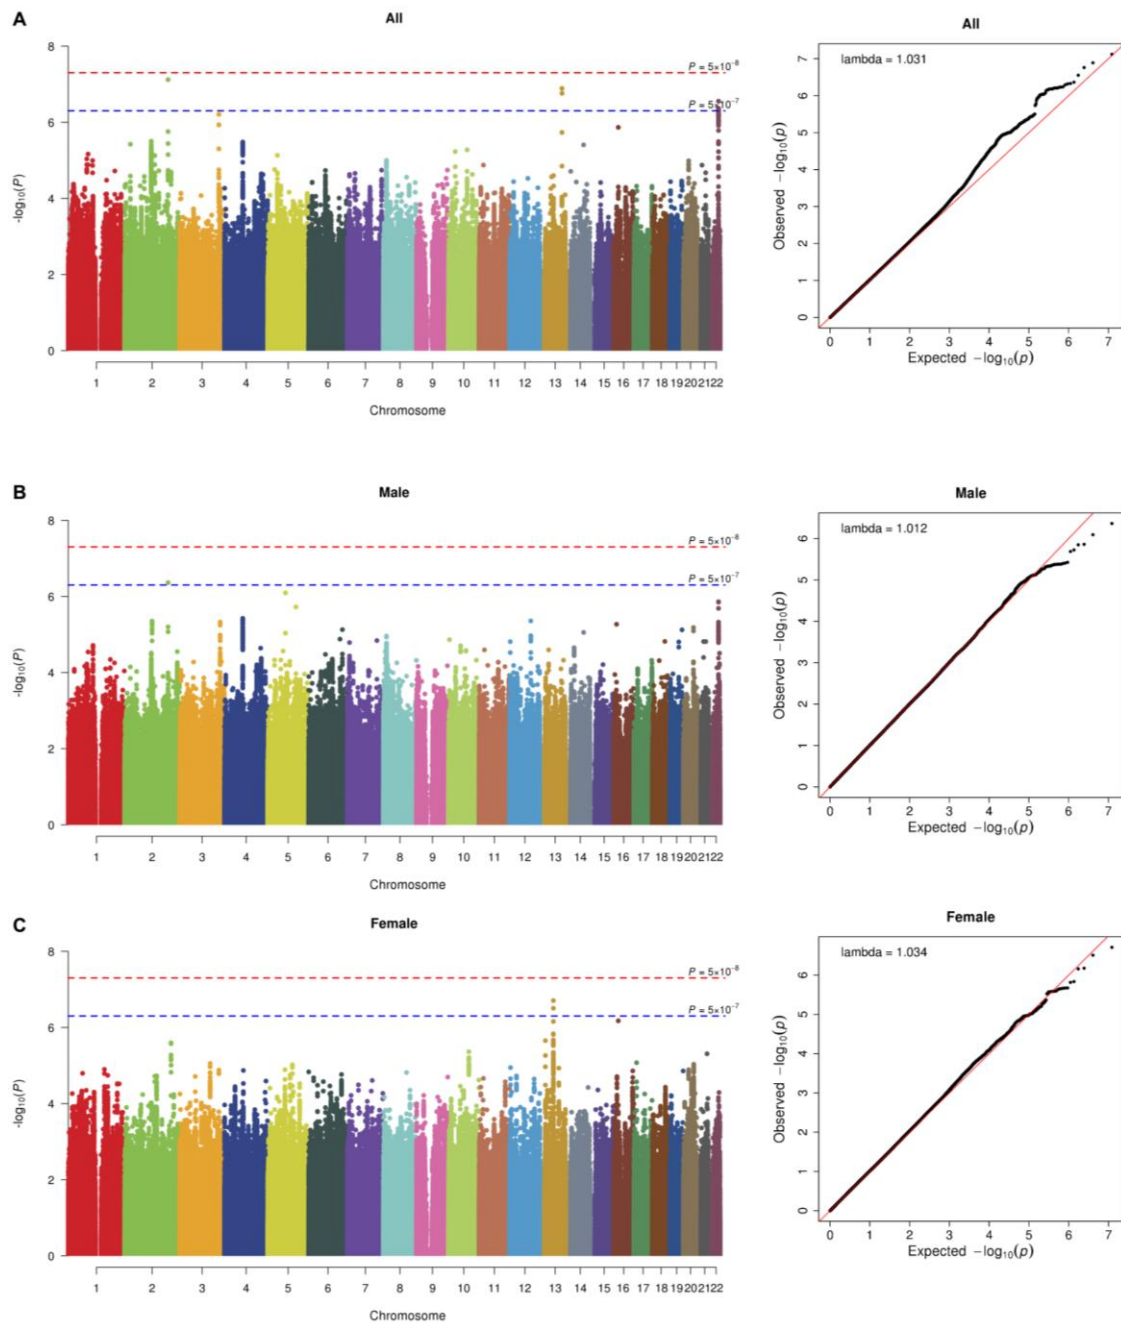

**Figure S3.** Manhattan and quantile-quantile (QQ) plots for the dietary vitamin E intake-related GWASs in the UK Biobank cohort. The associations ( $-\log_{10}(P)$  values, Y-axis) are plotted against genomic position (X-axis by chromosome and the chromosomal position of NCBI build 37). The red dashed line indicates the genome-wide significance threshold ( $P=5 \times 10^{-8}$ ). The blue dashed line indicates the suggestive significance threshold ( $P=5 \times 10^{-7}$ ). (A) All population; (B) male population and (C) female population.
